# Supplementary material for: Synthesis and Immunological Evaluation of a Single Molecular Construct MUC1 Vaccine Containing l-Rhamnose Repeating Units
Source: PubMed Central journal article supplement (PMC7397004; doi:10.3390/molecules25143137), 2020-07-09

**Supplementary information for:**

**Synthesis and immunological evaluation of a single molecular construct MUC1 vaccine containing L-rhamnose repeating units**

Md Kamal Hossain, Abhishek Vartak, Steven J. Sucheck and Katherine A. Wall

Figure S1. ESI-MS data of *N*-[(9H-fluoren-9-yl)methoxycarbonyl]-*O*-((2,3,4-tri-*O*-acetyl)- $\alpha$ -L-rhamnopyranosyl)-L-serine phenylmethyl ester **2**

Figure S2.  $^1\text{H}$  NMR of *N*-[(9H-fluoren-9-yl)methoxycarbonyl]-*O*-((2,3,4-tri-*O*-acetyl)- $\alpha$ -L-rhamnopyranosyl)-L-serine phenylmethyl ester **2**

Figure S3.  $^{13}\text{C}$  NMR of *N*-[(9H-fluoren-9-yl)methoxycarbonyl]-*O*-((2,3,4-tri-*O*-acetyl)- $\alpha$ -L-rhamnopyranosyl)-L-serine phenylmethyl ester **2**

Figure S4. HRMS data of *N*-[(9H-fluoren-9-yl)methoxycarbonyl]-*O*-((2,3,4-tri-*O*-acetyl)- $\alpha$ -L-rhamnopyranosyl)-L-serine **3**

Figure S5.  $^1\text{H}$  NMR of *N*-[(9H-fluoren-9-yl)methoxycarbonyl]-*O*-((2,3,4-tri-*O*-acetyl)- $\alpha$ -L-rhamnopyranosyl)-L-serine **3**

Figure S6.  $^{13}\text{C}$  NMR of *N*-[(9H-fluoren-9-yl)methoxycarbonyl]-*O*-((2,3,4-tri-*O*-acetyl)- $\alpha$ -L-rhamnopyranosyl)-L-serine **3**

Figure S7. MALDI-TOF data of single molecule construct of Pam<sub>3</sub>CSK<sub>4</sub>-DBCO-MUC1 -(Rha)<sub>3</sub> sequence **6**

Figure S8. MALDI-TOF data of single molecule construct of Pam<sub>3</sub>CSK<sub>4</sub>-DBCO-MUC1 **8**

Figure S1. ESI-MS data of *N*-[(9H-fluoren-9-yl)methoxycarbonyl]-*O*-((2,3,4-tri-*O*-acetyl)- $\alpha$ -L-rhamnopyranosyl)-L-serine phenylmethyl ester (**2**)

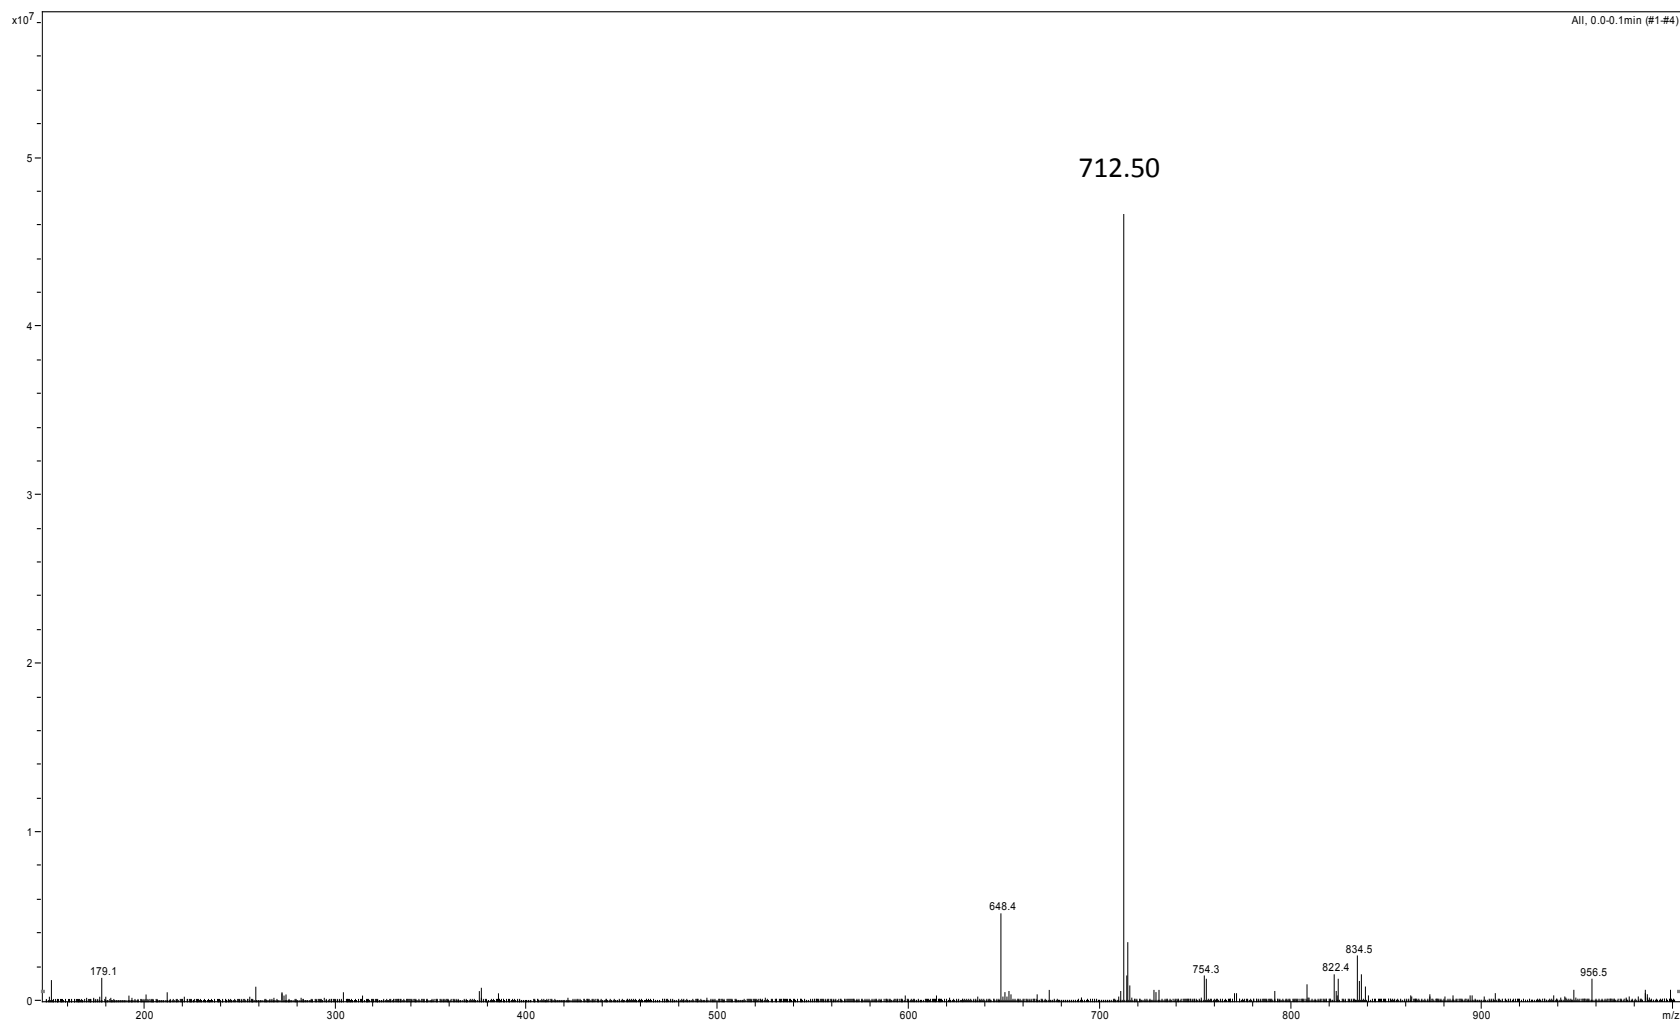

Figure S2.  $^1\text{H}$  NMR of *N*-[(9H-fluoren-9-yl)methoxycarbonyl]-*O*-((2,3,4-tri-*O*-acetyl)- $\alpha$ -L-rhamnopyranosyl)-L-serine phenylmethyl ester (**2**)

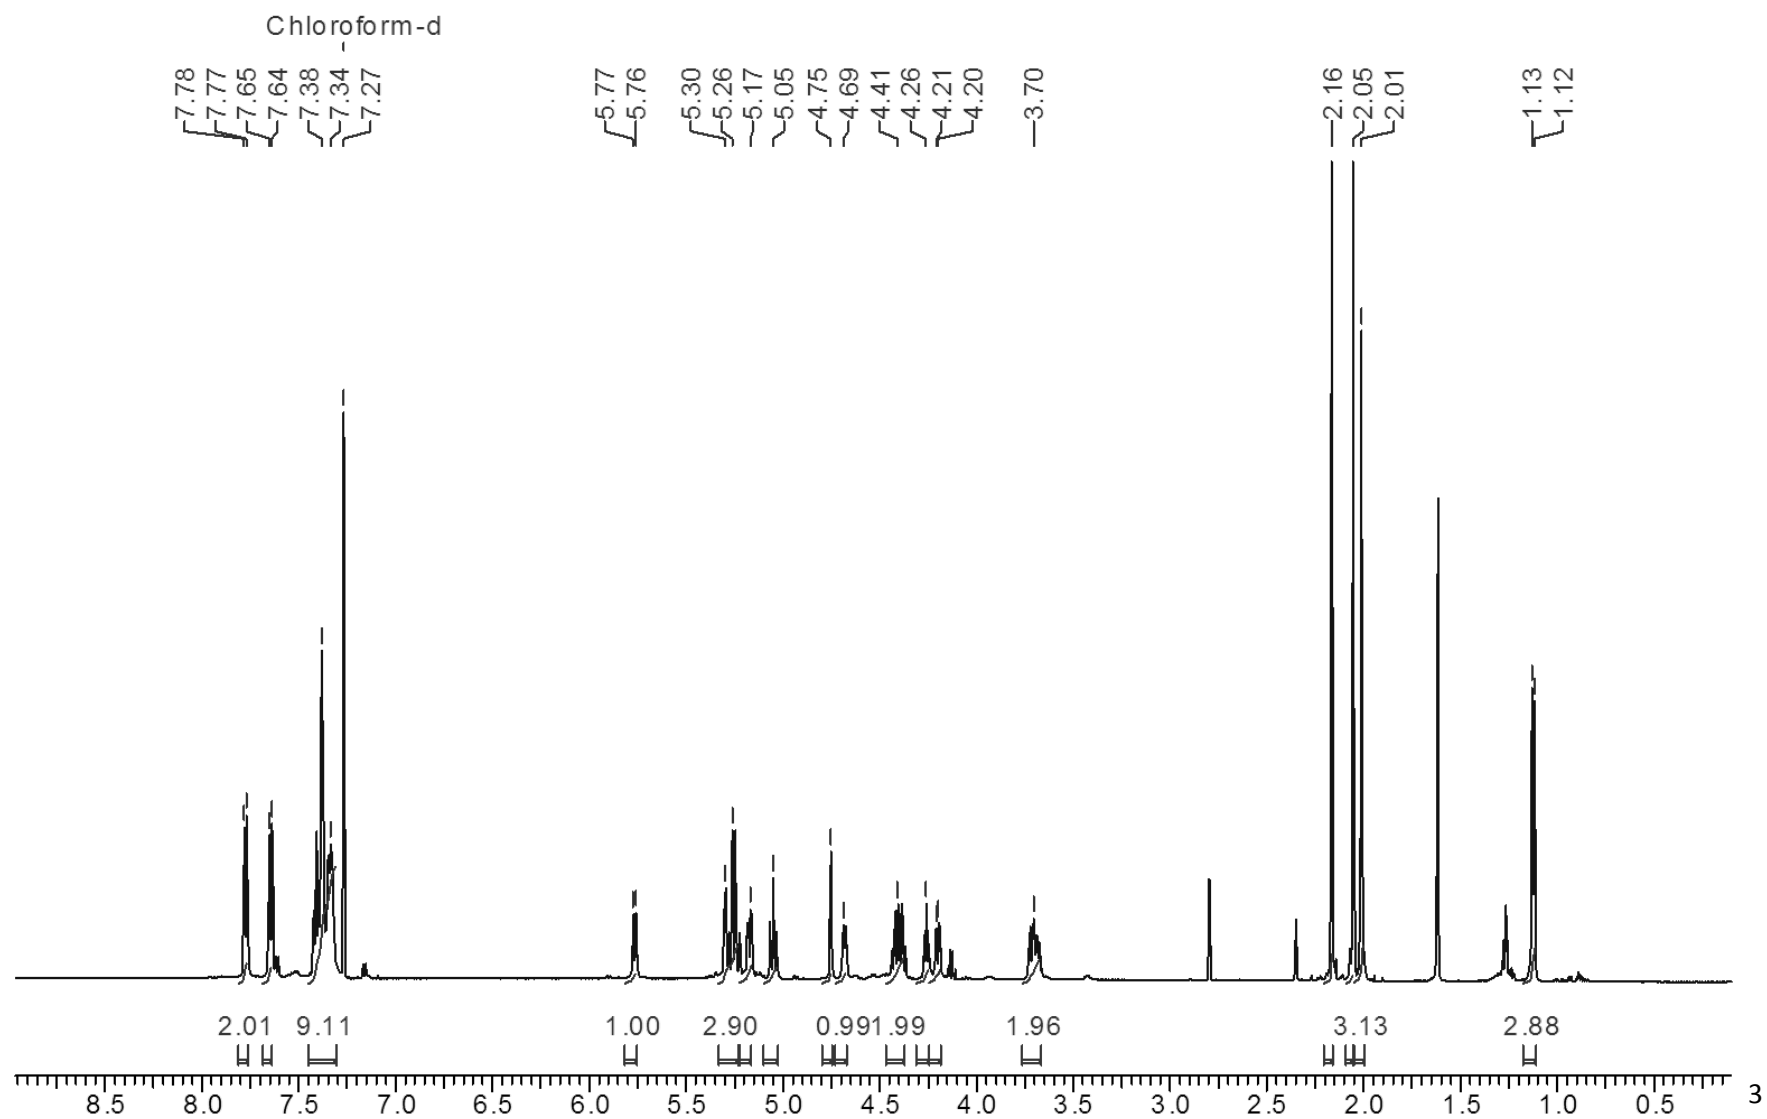

Figure S3.  $^{13}\text{C}$  NMR of *N*-[(9H-fluoren-9-yl)methoxycarbonyl]-*O*-((2,3,4-tri-*O*-acetyl)- $\alpha$ -L-rhamnopyranosyl)-L-serine phenylmethyl ester (**2**)

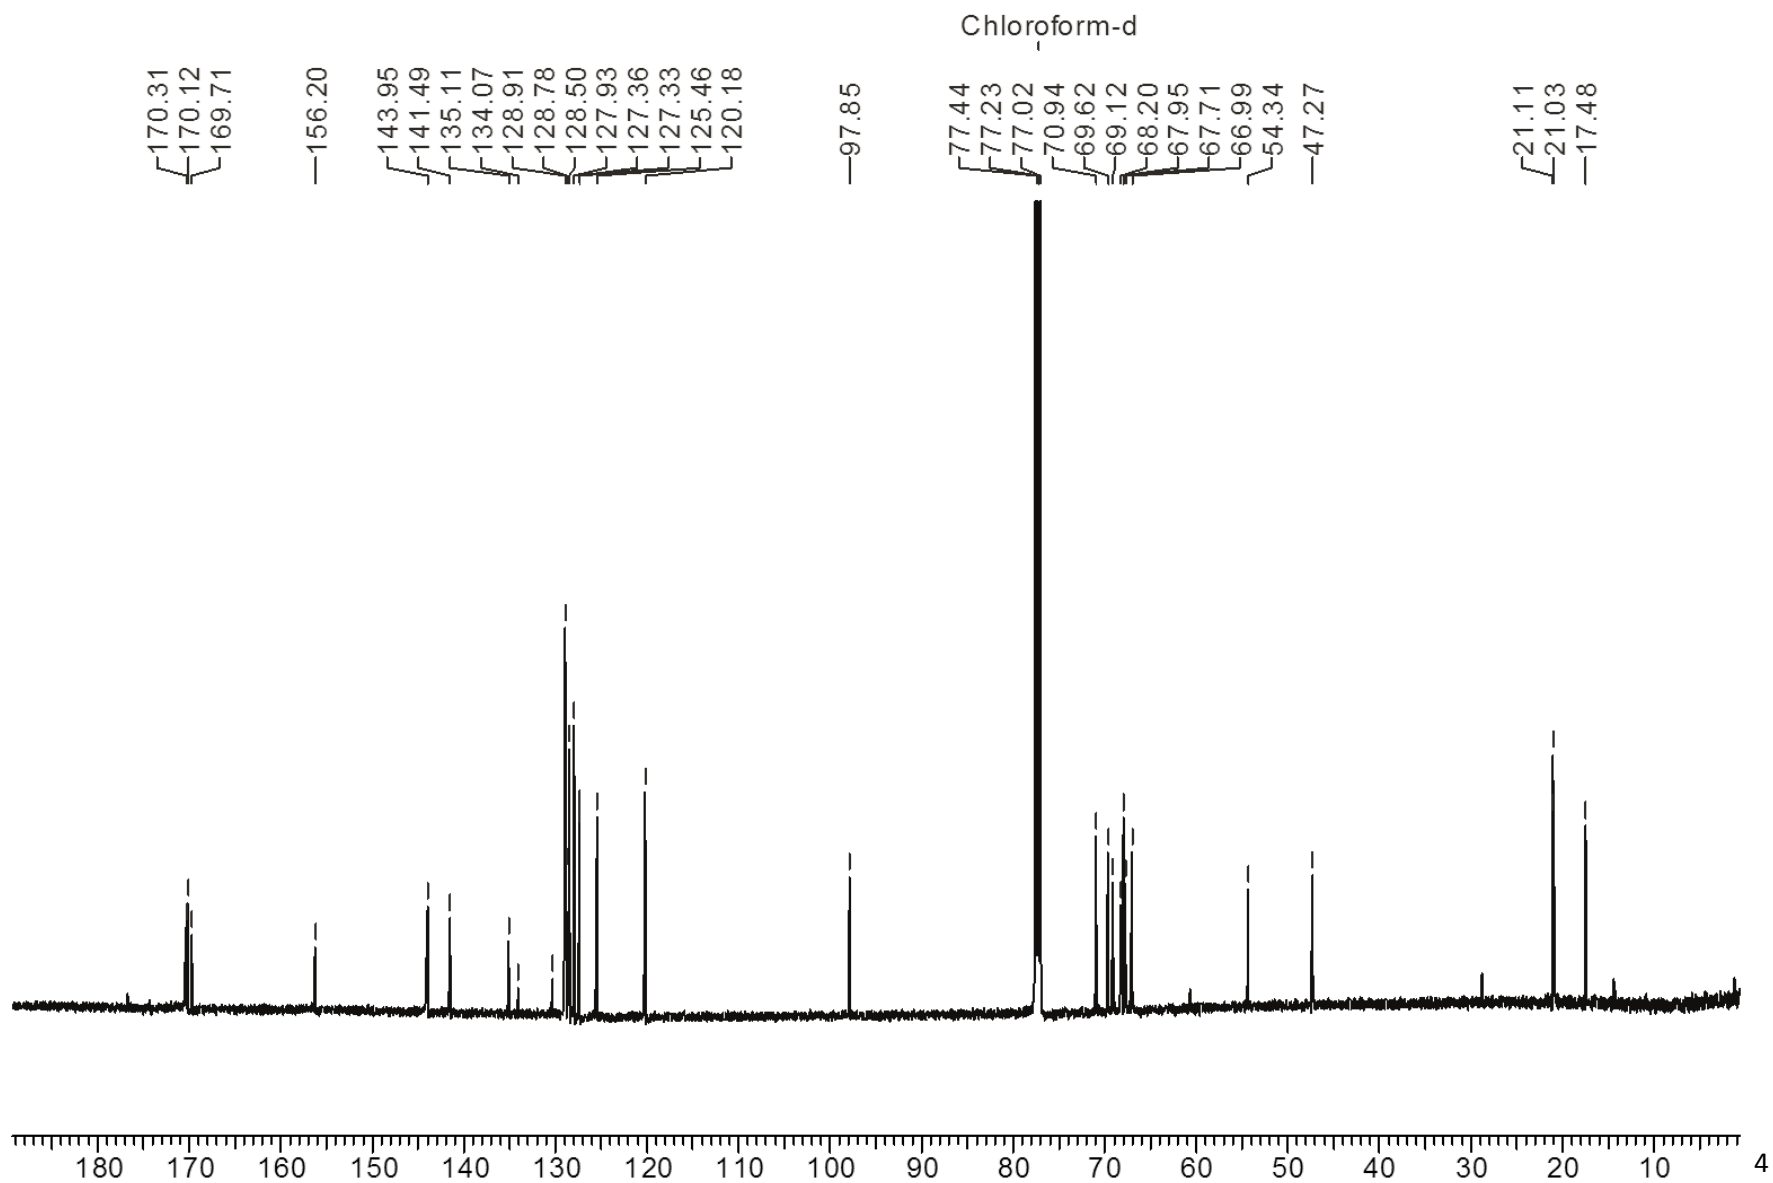

Figure S4. HRMS data of *N*-[(9H-fluoren-9-yl)methoxycarbonyl]-*O*-((2,3,4-tri-*O*-acetyl)- $\alpha$ -L-rhamnopyranosyl)-L-serine (**3**)

TL\_ABHISHEK\_AV224\_01102017 229 (3.910) AM (Cen,4, 80.00, Ar,8000.0,556.28,0.70); Cm (227:232)

TOF MS ES+  
1.13e5

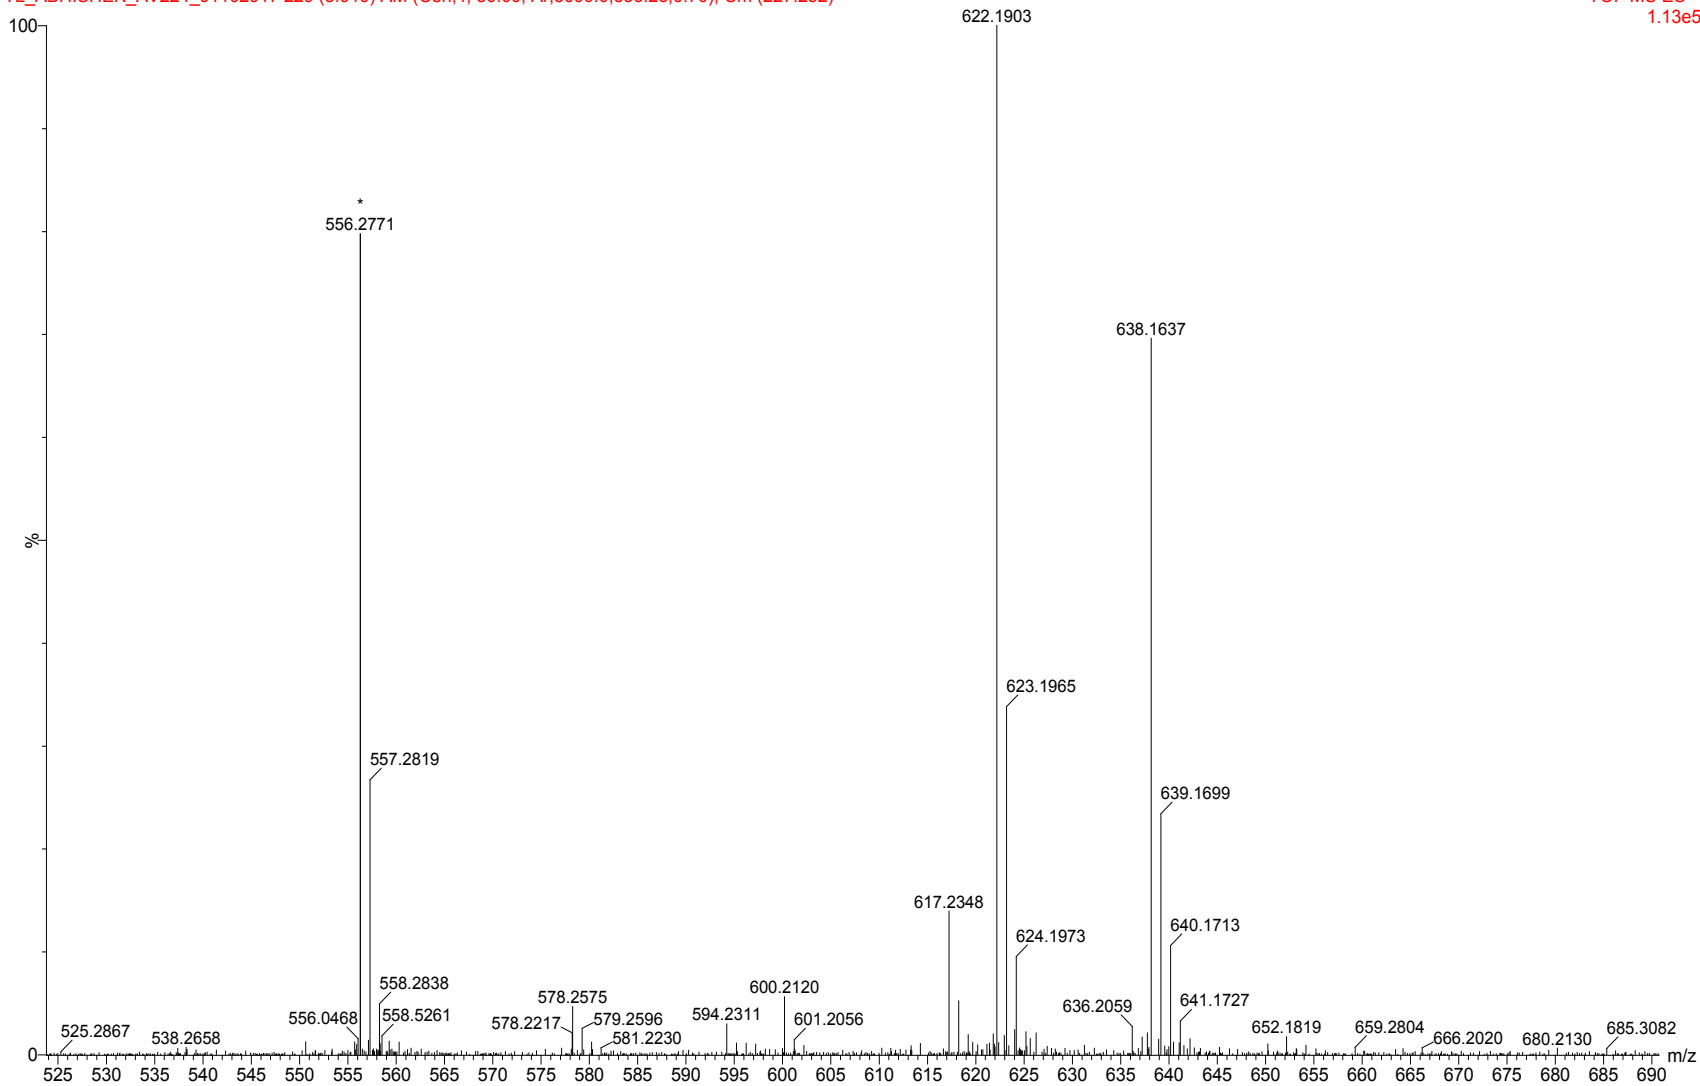

Figure S5.  $^1\text{H}$  NMR of *N*-[(9H-fluoren-9-yl)methoxycarbonyl]-*O*-((2,3,4-tri-*O*-acetyl)- $\alpha$ -L-rhamnopyranosyl)-L-serine (**3**)

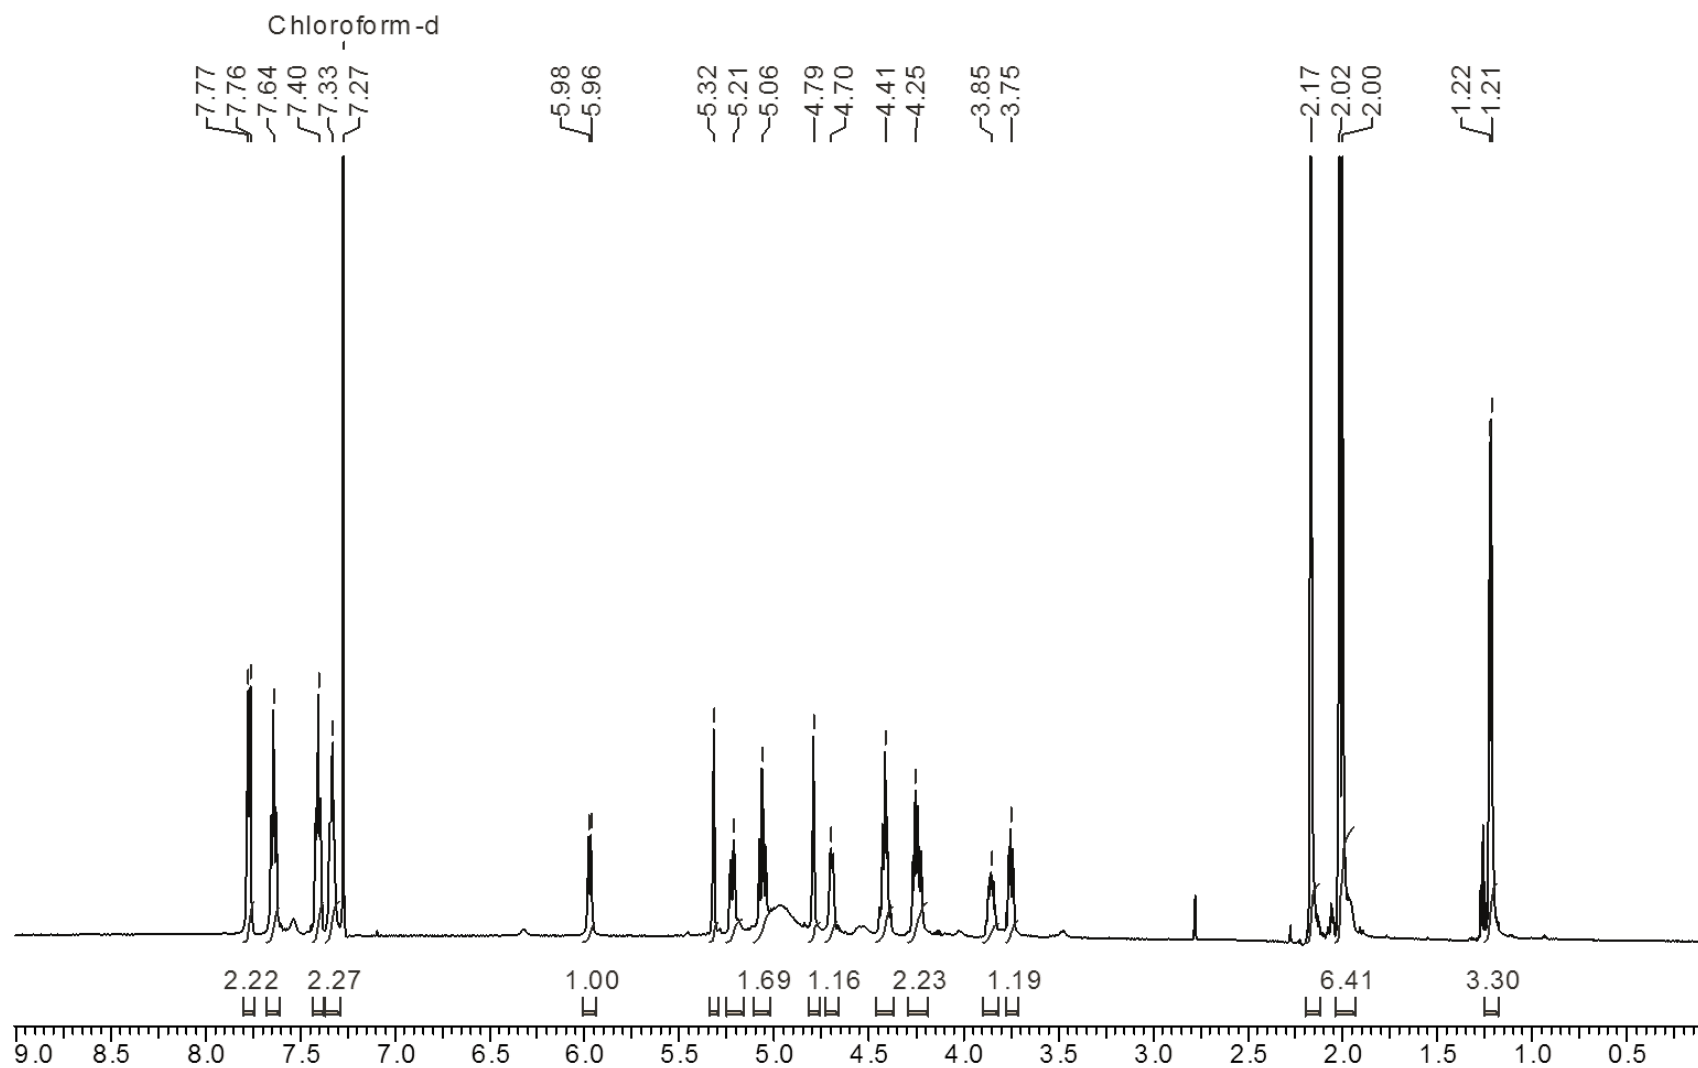

Figure S6.  $^{13}\text{C}$  NMR of *N*-[(9*H*-fluoren-9-yl)methoxycarbonyl]-*O*-((2,3,4-tri-*O*-acetyl)- $\alpha$ -L-rhamnopyranosyl)-L-serine (**3**)

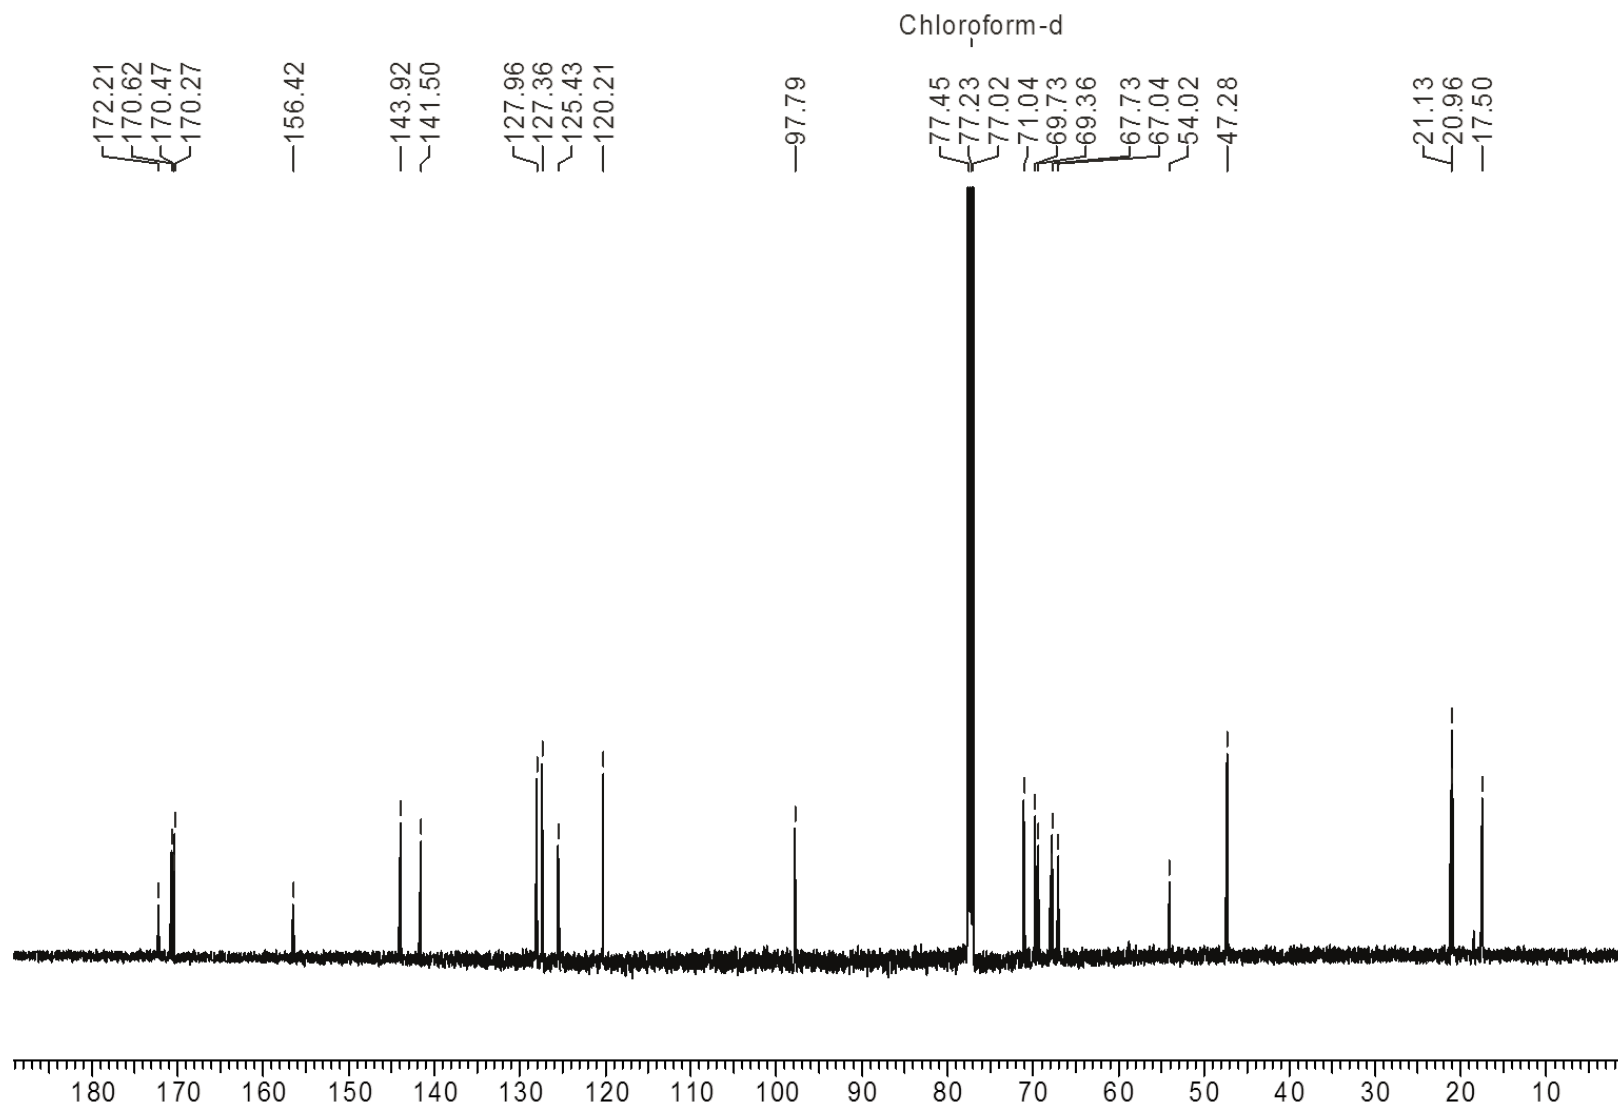

Figure S7. MALDI-TOF data of single molecule construct of Pam<sub>3</sub>CSK<sub>4</sub>-DBCO-MUC-1 -(Rha)<sub>3</sub> sequence (6)

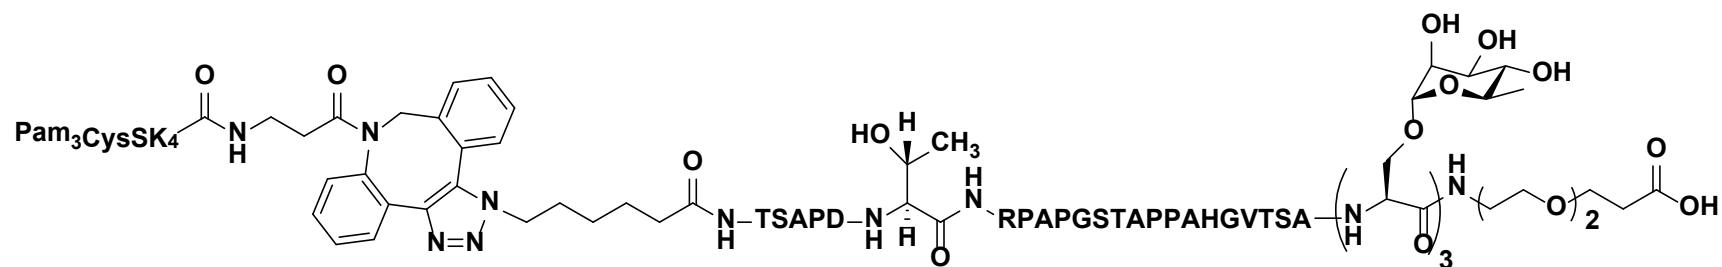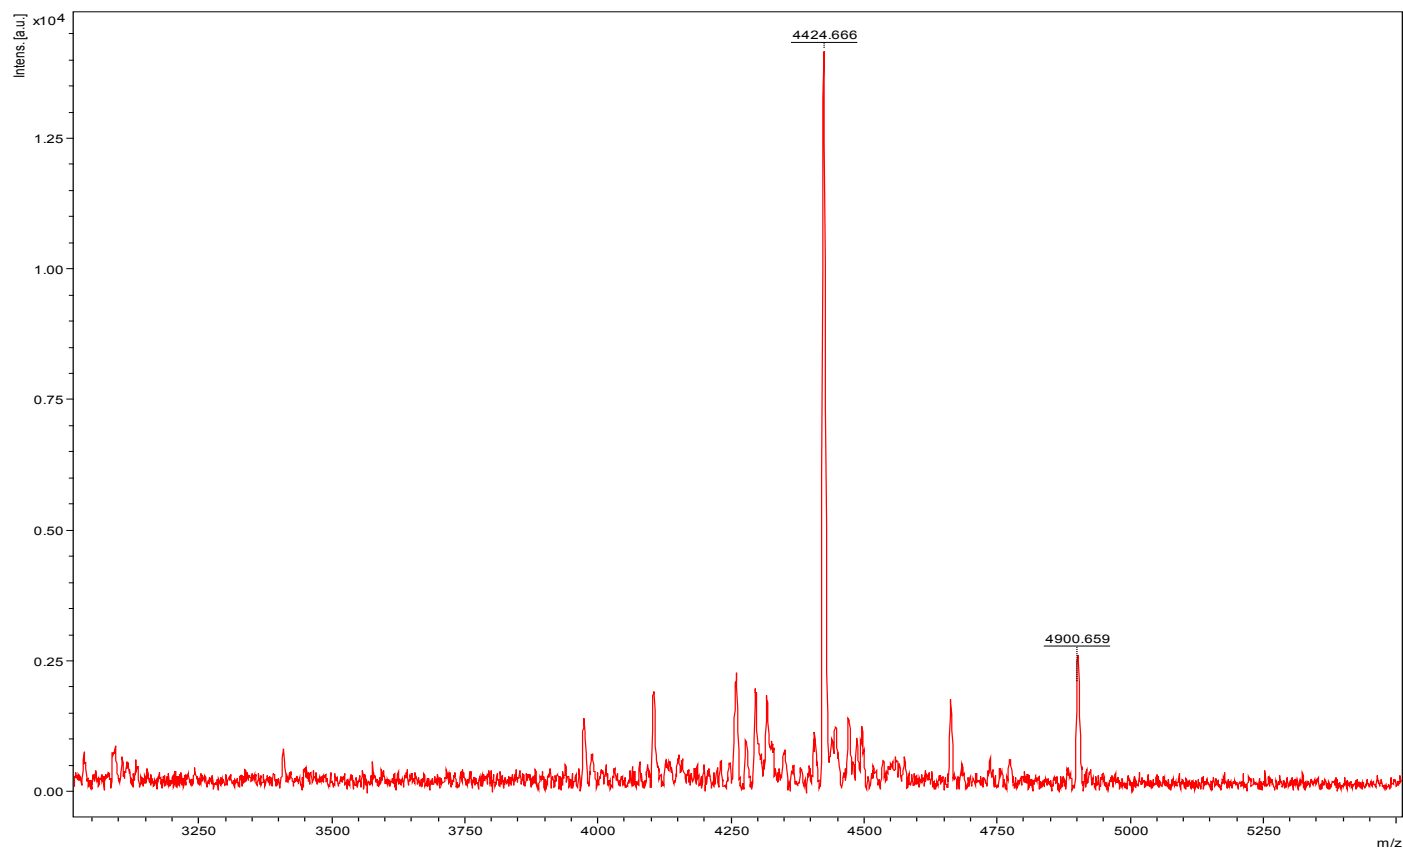



Figure S8. MALDI-TOF data of single molecule construct of Pam<sub>3</sub>CSK<sub>4</sub>-DBCO-MUC-1 (**8**)

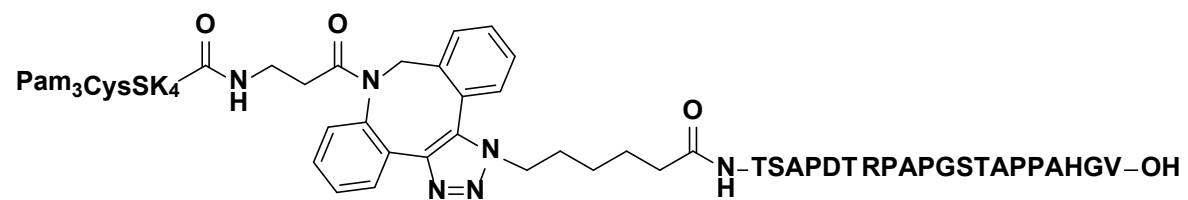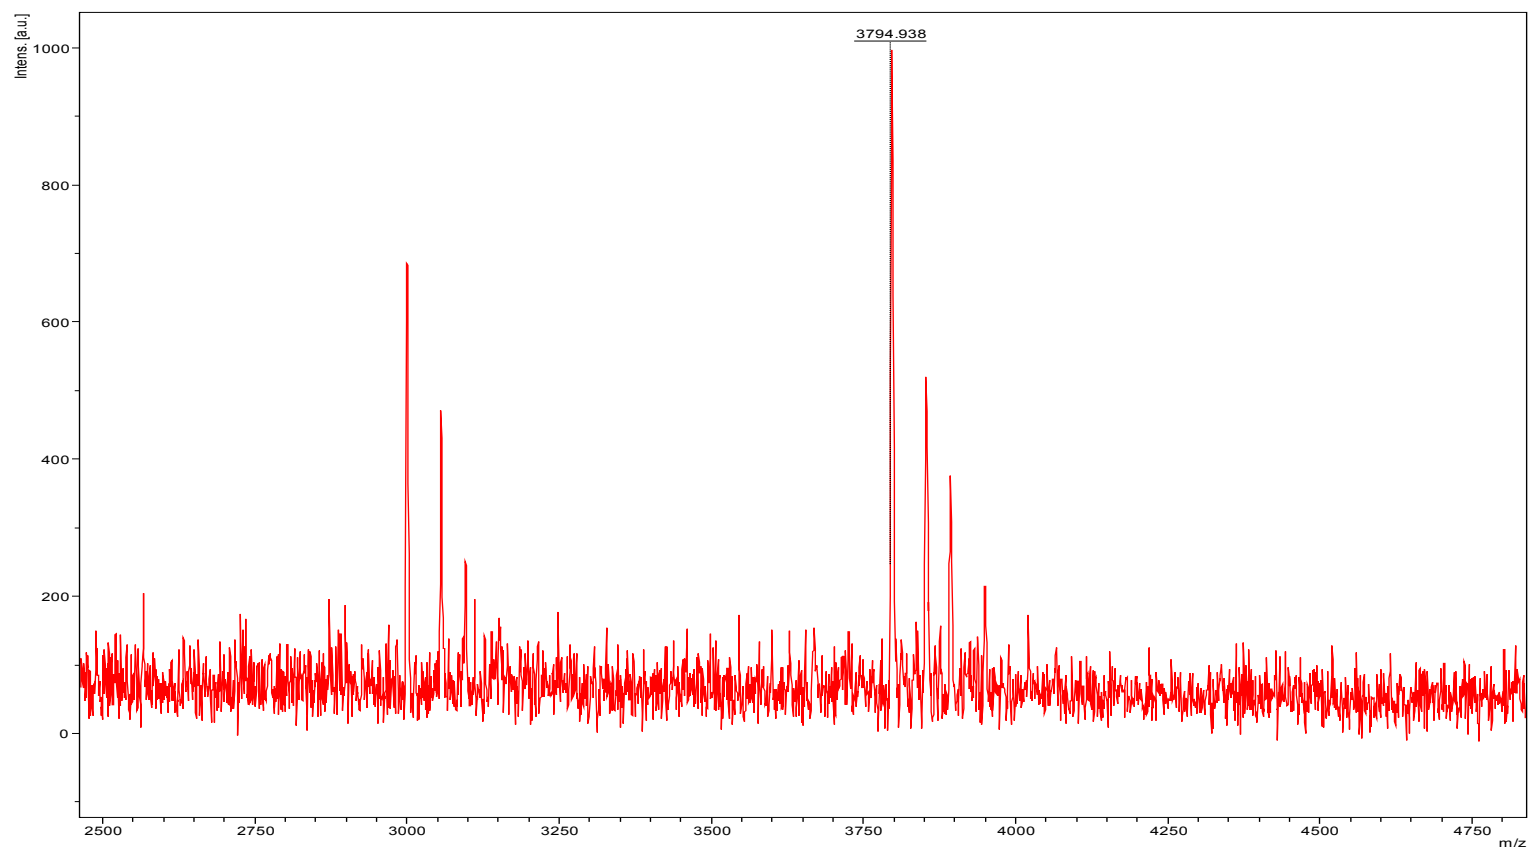

Supplement: molecules-25-03137-s001.pdf [file molecules-25-03137-s001.pdf]
